# Supplementary material for: Extensive plasma proteomic profiling revealed receptor activator of nuclear factor kappa-Β ligand (RANKL) as emerging biomarker of nivolumab clinical benefit in patients with metastatic renal cell carcinoma
Source: PubMed Central journal article supplement — J Immunother Cancer. 2022 Sep 14;10(9):e005136. doi: 10.1136/jitc-2022-005136 (PMC9476128; doi:10.1136/jitc-2022-005136), 2022-09-14
Supplement: jitc-2022-005136supp001.pdf [file jitc-2022-005136supp001.pdf]

Supplementary table 1. Clinicopathological variables correlation with PFS and OS

|                  |                   | PFS                     |       |       |       | OS                      |       |        |     |       |
|------------------|-------------------|-------------------------|-------|-------|-------|-------------------------|-------|--------|-----|-------|
|                  |                   | 95% Confidence Interval |       |       |       | 95% Confidence Interval |       |        |     |       |
|                  |                   | Median                  | Lower | Upper | P     | Median                  | Lower | Upper  | P   |       |
| SEX              | FEMALE            | 6.97                    | 3.26  | 23.6  | 0.658 | FEMALE                  | 30.1  | 28.59  | NaN | 0.928 |
|                  | MALE              | 5.39                    | 2.86  | NaN   |       | MALE                    | 36.0  | 5.56   | NaN |       |
| AGE              | ≥ 66              | 5.67                    | 2.99  | NaN   | 0.301 | ≥ 66                    | 30.1  | 5.56   | NaN | 0.323 |
|                  | < 66              | 7.99                    | 3.09  | NaN   |       | < 66                    | NaN   | 35.99  | NaN |       |
| THERAPY LINE     | SECOND            | 7.99                    | 3.421 | 23.6  | 0.317 | SECOND                  | 36.0  | 30.099 | NaN | 0.559 |
|                  | THIRD             | 3.13                    | 0.461 | NaN   |       | THIRD                   | 11.3  | 0.987  | NaN |       |
| FIRST LINE - TKI | SUNITINIB         | 5.95                    | 3.20  | NaN   | 0.676 | SUNITINIB               | NaN   | 28.6   | NaN | 0.847 |
|                  | PAZOPANIB         | 6.69                    | 3.09  | NaN   |       | PAZOPANIB               | 30.1  | 22.1   | NaN |       |
| IMDC SCORE       | GOOD RISK         | 5.79                    | 3.09  | NaN   | 0.677 | GOOD RISK               | NaN   | 22.1   | NaN | 0.596 |
|                  | INTERMEDIATE RISK | 5.95                    | 2.99  | 23.6  |       | INTERMEDIATE RISK       | 36.0  | 28.6   | NaN |       |
